# Supplementary material for: Mitotic regulators TPX2 and Aurora A protect DNA forks during replication stress by counteracting 53BP1 function
Source: PubMed Central journal article supplement — J Cell Biol. 2019 Feb 4;218(2):422–32. doi: 10.1083/jcb.201803003 (PMC6363440; doi:10.1083/jcb.201803003), 2019-02-04
Supplement: JCB_201803003_sm.pdf [file JCB_201803003_sm.pdf]

## Supplemental material

Byrum et al., <https://doi.org/10.1083/jcb.201803003>

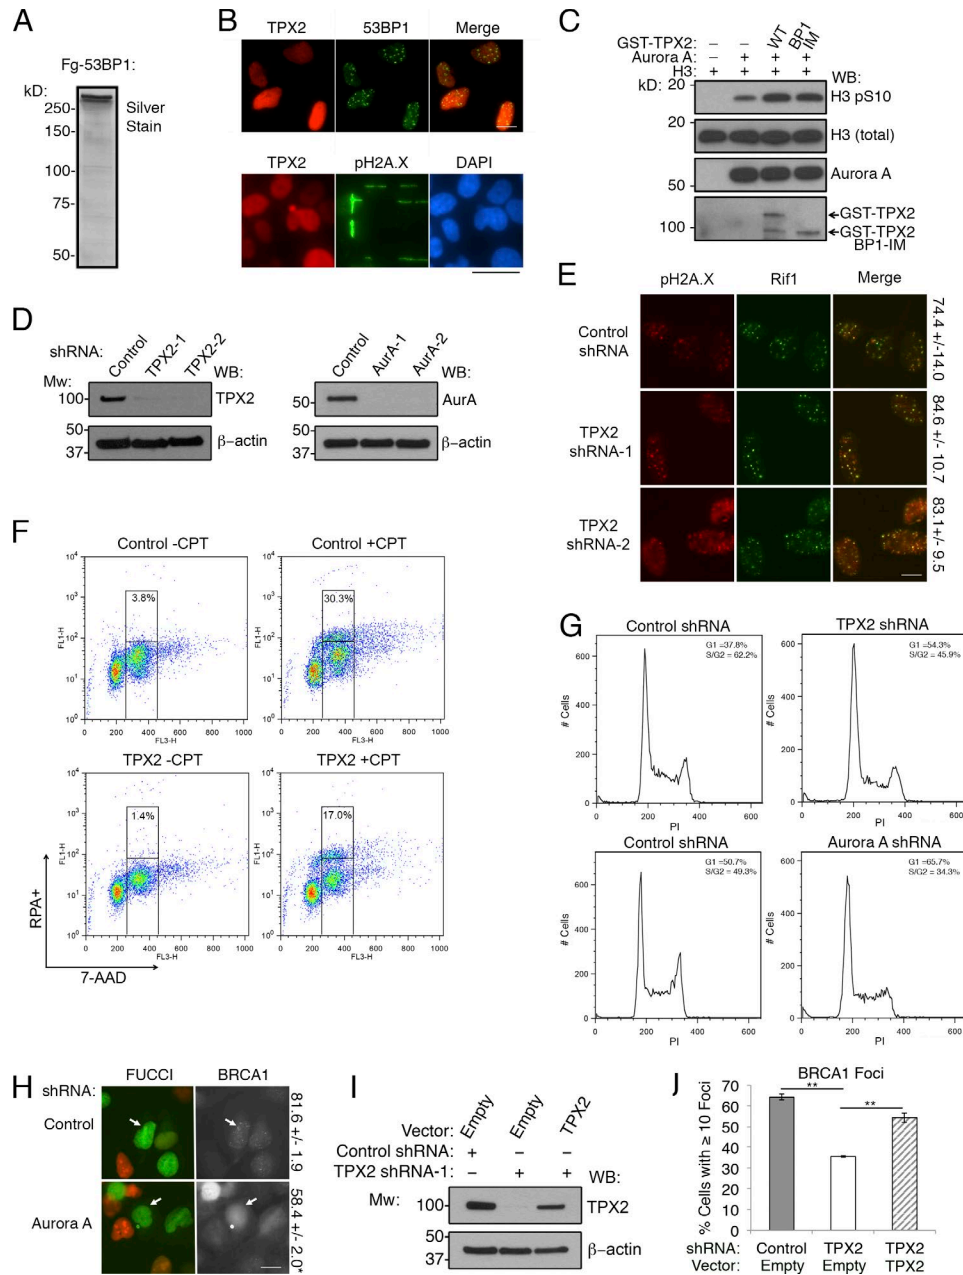

**Figure S1. TPX2/Aurora A impair BRCA1 foci formation and DNA end resection in S/G2 but do not localize to DSBs.** (A) Flag-53BP1 from Fig. 1 was purified from Sf9 cells infected with pDEST-BB-Flag-53BP1 recombinant baculovirus and verified by silver stain. (B) U2OS cells were  $\gamma$ -irradiated (5 Gy) and analyzed for TPX2 and 53BP1 localization (top). Scale bar, 10  $\mu$ m. U2OS cells were subjected to laser microirradiation and stained for TPX2 and pH2A.X localization (bottom). Scale bar, 50  $\mu$ m. (C) GST-TPX2 and GST-TPX2-BP1-IM both activate Aurora A in vitro. Recombinant His-Aurora A and the indicated GST proteins were incubated with histone H3.1 and ATP. Phosphorylated H3 (serine 10) was analyzed by Western blot. (D) Western blot of U2OS cells following shRNA-mediated knockdown of TPX2 (left) or Aurora A (right). (E) U2OS cells expressing the indicated shRNAs were  $\gamma$ -irradiated (5 Gy) and analyzed for Rif1 and pH2A.X foci formation. Quantification of Rif1 foci (percentage of cells with  $\geq 10$  foci  $\pm$  SD) is shown on the right. Scale bar, 10  $\mu$ m. Foci were quantitated from three biological replicate experiments with  $n \geq 180$  cells per experiment. Statistics: Student's two-tailed  $t$  test.  $P > 0.3$  (not significant) for both shRNA-treated cells compared with control. (F) Representative flow cytometry plots and gating for TPX2 knockdown cells shown in Fig. 2 B. Total S/G2 phase cells were gated according to 7-AAD staining, and RPA-positive cells were quantified as a percentage of this population. Percentages indicate the average of four biological replicates. (G) Representative cell cycle profiles of WT U2OS and TPX2 knockdown cells (top) and WT U2OS and Aurora A knockdown cells (bottom) as determined by propidium iodide DNA staining. G1 and S/G2 populations were determined using the Dean/Jett/Fox algorithm in Flow Jo software. Percentages represent the average of three biological replicate experiments. (H) U2OS-FUCCI cells were treated with a control or Aurora A shRNA, and S/G2 phase cells (yellow or green cells; indicated by white arrows) were specifically analyzed for BRCA1 foci formation. Quantification of BRCA1 foci in S/G2 phase cells (percentage of cells with  $\geq 10$  foci  $\pm$  SD) is shown on the right. Scale bar, 10  $\mu$ m. Foci were quantitated from three biological replicate experiments with  $n \geq 170$  cells per experiment. Statistics: Student's two-tailed  $t$  test; \*,  $P < 0.05$ . (I) Western blot of U2OS cells expressing the indicated combination of shRNA and TPX2 expression vector as described for Fig. 3 C. (J) Cells expressing the indicated combination of shRNA and TPX2 expression vector were quantified for BRCA1 foci. Graph depicts the average of two biological replicate experiments with  $n \geq 180$  cells per experiment. Error bars represent  $\pm$  SD. Statistics: Student's two-tailed  $t$  test; \*\*,  $P < 0.01$ .

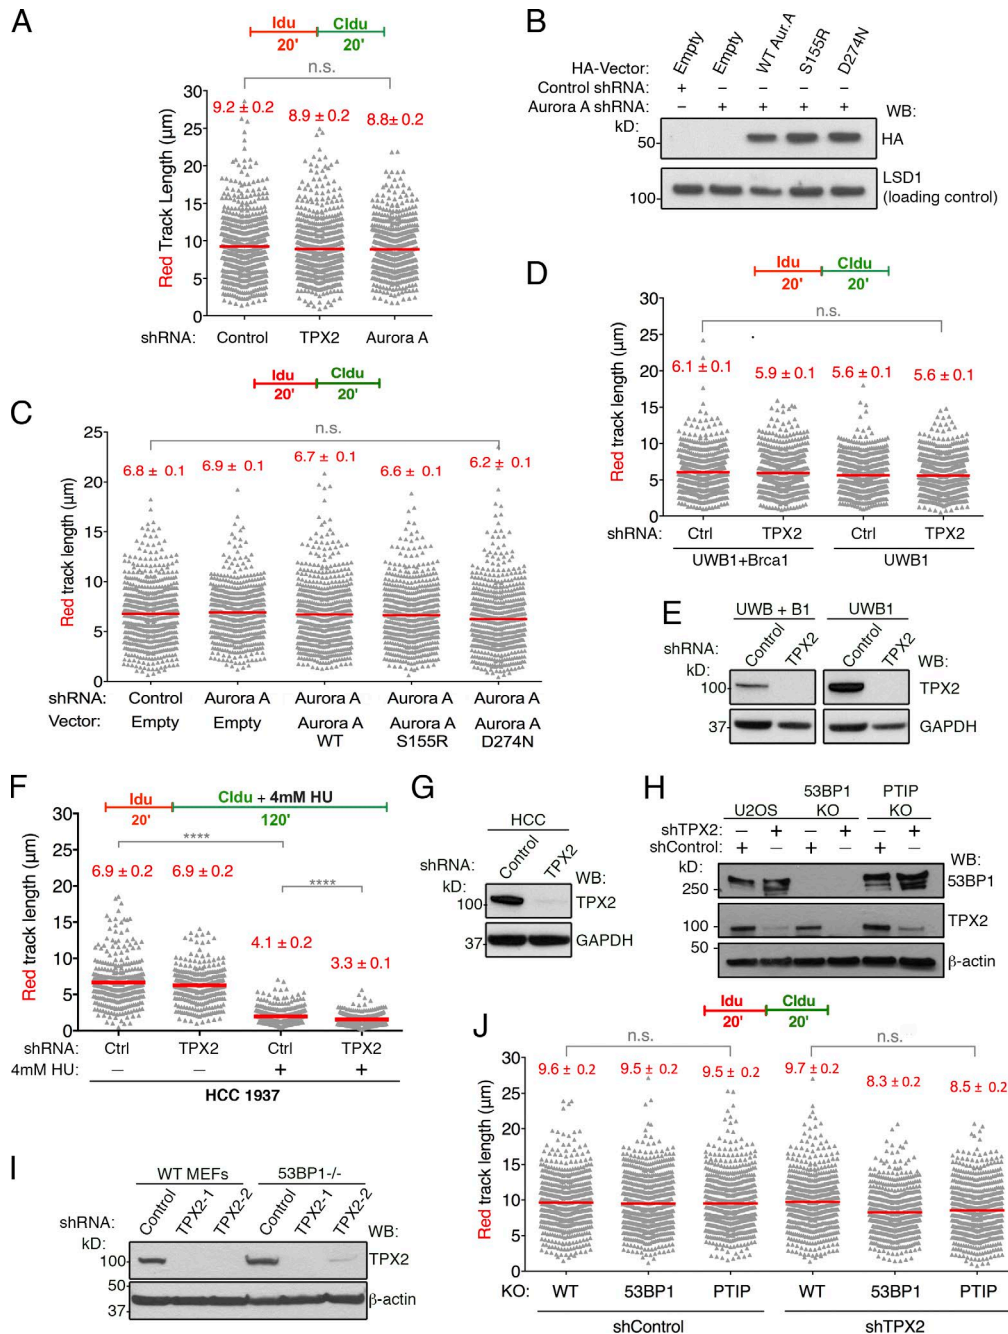

Figure S2. **Loss of TPX2/Aurora A results in replication fork deprotection but does not affect replication fork speed.** (A) Schematic of the single-molecule DNA fiber track analysis (top) and size distribution of Idu track length in TPX2- and Aurora A-depleted cells in the absence of HU (bottom). Cells were infected with control, TPX2, or Aurora A shRNA before Idu and CldU labeling, as indicated. Out of two biological replicates;  $n \geq 300$  tracks scored for each dataset. Bars represent median. Statistics: Mann-Whitney; n.s., not significant. (B) Western blot (WB) of HA-Aurora A expression for rescue experiment shown in Fig. 3 D. (C) Schematic of the single-molecule DNA fiber track analysis (top) and size distribution of Idu track length in U2OS cells expressing the indicated combination of shRNA and Aurora A expression vector in the absence of HU, as performed in A. Out of two biological replicate experiments;  $n \geq 300$  tracks were scored for each dataset. Bars represent median. Statistics: Mann-Whitney; n.s., not significant. (D) Schematic of the single-molecule DNA fiber track analysis (top) and size distribution of Idu track length in BRCA1-deficient (UWB1) and -proficient (UWB1 + BRCA1) cells in the absence of HU (bottom). Cells were treated with control or TPX2 shRNA before Idu and CldU labeling, as indicated. Out of two biological replicate experiments;  $n \geq 300$  tracks scored for each dataset. Bars represent median. Statistics: Mann-Whitney; n.s., not significant. (E) Western blot of BRCA1-deficient (UWB1) and -proficient (UWB1 + BRCA1) cells following treatment with either control or TPX2 shRNA. (F) Schematic of the single-molecule DNA fiber track analysis (top) and size distribution of Idu track length in BRCA-deficient HCC 1937 cells expressing the indicated shRNAs in the presence or absence of HU.  $n \geq 300$  tracks were scored in one biological experiment. Statistics: Mann-Whitney; \*\*\*\*,  $P < 0.0001$ . (G) Western blot of HCC 1937 cells following treatment with either control or TPX2 shRNA. (H) Western blot of HCC 1937 cells following treatment with the indicated shRNA. (I) Western blot of WT and 53BP1<sup>-/-</sup> MEFs following treatment with the indicated shRNA. (J) Schematic of the single-molecule DNA fiber track analysis (top) and size distribution of Idu track length in WT U2OS, 53BP1 KO, and PTIP KO cells following treatment with control or TPX2 shRNA in the absence of HU (bottom). Out of two biological repeats;  $n \geq 300$  tracks scored for each dataset. Bars represent median. Statistics: Mann-Whitney; n.s., not significant.

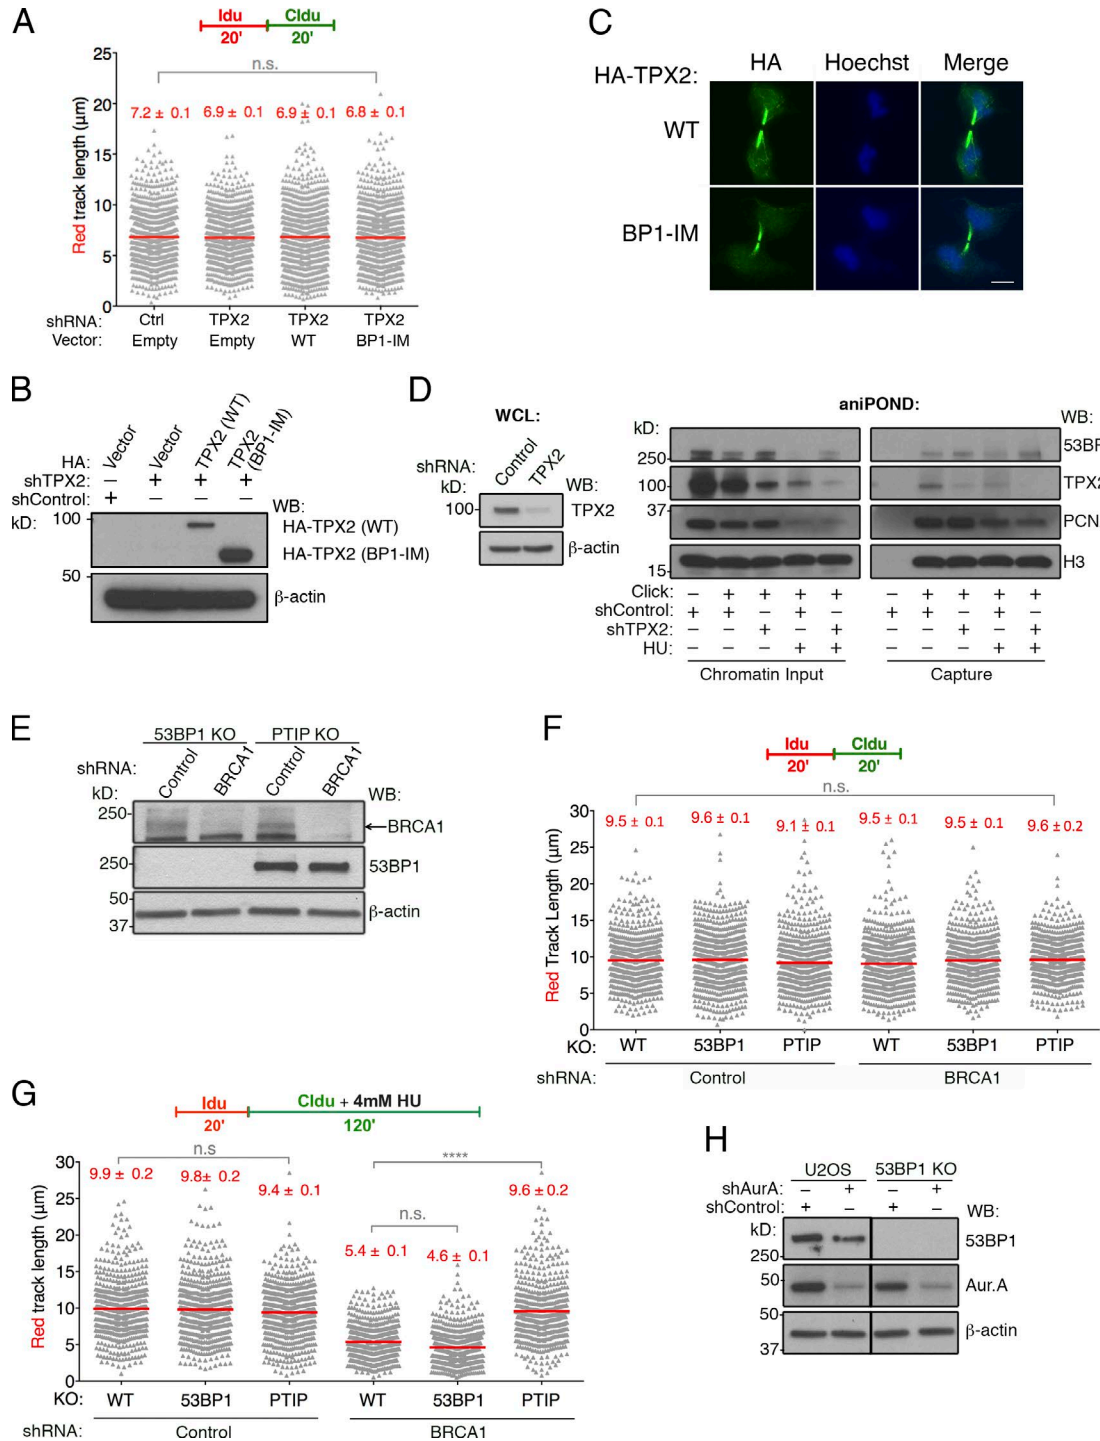

**Figure S3. TPX2/Aurora A protect stalled replication forks in a manner that is independent of its mitotic functions, but through a direct interaction with 53BP1.** (A) Schematic of the single-molecule DNA fiber track analysis (top) and size distribution of IdU track length in U2OS cells expressing the indicated shRNA and TPX2 expression vector in the absence of HU (bottom). Out of three biological repeats;  $n \geq 300$  tracks scored for each dataset. Bars represent median. Statistics: Mann-Whitney; n.s., not significant. (B) Western blot of U2OS cells treated with the indicated shRNA and TPX2 rescue vectors that were used for fiber analysis in A and Fig. 4 G. (C) TPX2 WT and TPX2-BP1-IM both localize to spindles during mitosis. U2OS cells expressing the indicated HA-tagged proteins were analyzed by immunofluorescence without nuclear extraction, as described in Materials and methods. Scale bar, 10  $\mu\text{m}$ . (D) U2OS cells infected with the indicated shRNAs were pulse labeled with EdU and subsequently treated with 4 mM HU for 2 h. Proteins bound to nascent DNA were purified by aniPOND as described in Materials and methods and analyzed by Western blot (right). Shown is a representative of two biological replicates. Western blot of whole cell lysates for the control and TPX2 knockdown cells is shown on the left. (E) Western blot of 53BP1 KO and PTIP KO cells following treatment with control or BRCA1 shRNA. Arrow indicates BRCA1 band. (F and G) Loss of PTIP but not 53BP1 rescues replication fork degradation due to BRCA1 depletion. Size distribution of IdU track length in WT U2OS, 53BP1 KO, and PTIP KO cells following treatment with control or BRCA1 shRNA in the absence (F) or presence (G) of HU. Out of two biological repeats;  $n \geq 300$  tracks scored for each dataset. Bars represent median. Statistics: Mann-Whitney; \*\*\*\*,  $P < 0.0001$ , n.s., not significant. (H) Western blot of WT U2OS and 53BP1 KO cells following treatment with control or Aurora A shRNA, as used in Fig. 4 H.

Table S1. **MS analysis of Flag-HA-53BP1**

| Z-Score         | % TAPs | Ratio   | ASF   | S-Score | D-Score | UniPep | Tot Pep | IPI                         | GeneID | Symbol           |
|-----------------|--------|---------|-------|---------|---------|--------|---------|-----------------------------|--------|------------------|
| <b>MS Run 1</b> |        |         |       |         |         |        |         |                             |        |                  |
| 10.79           | 3      | 7/270   | 170.3 | 124.06  | 770.46  | 113    | 399     | IPI00029778                 | 7158   | <i>TP53BP1</i>   |
| 9.41            | 36     | 97/270  | 13.8  | 18.43   | 30.74   | 99     | 122     | IPI00296337                 | 5591   | <i>PRKDC</i>     |
| 10.61           | 1      | 4/270   | 58.8  | 84.59   | 694.96  | 1,43   | 106     | IPI00103951,<br>IPI00045496 | 57646  | <i>USP28</i>     |
| 11.99           | 2      | 6/270   | 26    | 57.31   | 384.48  | 43     | 73      | IPI00470805                 | 9656   | <i>MDC1</i>      |
| 12.34           | 6      | 17/270  | 8.3   | 30.61   | 121.99  | 22     | 59      | IPI00031650                 | 84309  | <i>NUDT16L1</i>  |
| 11.55           | 1      | 2/270   | 55    | 86.17   | 1001.19 | 30     | 55      | IPI00032958                 | 54443  | <i>ANLN</i>      |
| 12.45           | 2      | 6/270   | 20.3  | 49.75   | 333.73  | 37     | 55      | IPI00305289                 | 3832   | <i>KIF11</i>     |
| 1.48            | 99     | 266/270 | 29.8  | 7.33    | 7.39    | 34     | 53      | IPI00003362                 | 3309   | <i>HSPA5</i>     |
| 10.43           | 1      | 4/270   | 27.8  | 57.51   | 472.5   | 39     | 49      | IPI00293845                 | 55183  | <i>RIF1</i>      |
| 11.66           | 1      | 3/270   | 31    | 63.64   | 603.74  | 38     | 45      | IPI00293921                 | 11073  | <i>TOPBP1</i>    |
| 11.39           | 1      | 2/270   | 35.5  | 68.74   | 798.67  | 25     | 35      | IPI00008477                 | 22974  | <i>TPX2</i>      |
| -0.92           | 99     | 266/270 | 55.1  | 5.61    | 5.65    | 19     | 31      | IPI00003865                 | 3312   | <i>HSPA8</i>     |
| 8.47            | 39     | 104/270 | 4.5   | 8.97    | 14.45   | 16     | 31      | IPI00011200                 | 26227  | <i>PHGDH</i>     |
| 6.62            | 4      | 12/270  | 13.6  | 25.1    | 119.06  | 23     | 28      | IPI00021405                 | 4000   | <i>LMNA</i>      |
| 6.87            | 6      | 16/270  | 10.8  | 21.74   | 89.29   | 3,20   | 28      | IPI00305282,<br>IPI00107531 | 10111  | <i>RAD50</i>     |
| 10.73           | 1      | 2/270   | 29    | 60.37   | 701.48  | 21     | 27      | IPI00306400                 | 3833   | <i>KIFC1</i>     |
| 3.22            | 60     | 163/270 | 5.9   | 6.31    | 8.11    | 16     | 24      | IPI00002214                 | 3838   | <i>KPNA2</i>     |
| 10.18           | 18     | 48/270  | 3.8   | 11.37   | 26.98   | 14     | 23      | IPI00024661                 | 9632   | <i>SEC24C</i>    |
| -0.34           | 96     | 260/270 | 27.2  | 4.67    | 4.76    | 15     | 21      | IPI00007752                 | 10383  | <i>TUBB2C</i>    |
| 1.06            | 93     | 250/270 | 10.3  | 4.76    | 4.95    | 9      | 21      | IPI00014424                 | 1917   | <i>EEF1A2</i>    |
| 9.26            | 2      | 6/270   | 9.3   | 29.24   | 196.15  | 1,15   | 19      | IPI00745518,<br>IPI00220113 | 4134   | <i>MAP4</i>      |
| 0.68            | 7      | 18/270  | 36.4  | 16.88   | 65.38   | 1,14   | 19      | IPI00641743,<br>IPI00019848 | 3054   | <i>HCFC1</i>     |
| 11.87           | 1      | 3/270   | 12    | 40.25   | 381.84  | 14     | 18      | IPI00295502                 | 58525  | <i>WIZ</i>       |
| 1.23            | 91     | 245/270 | 10    | 4.33    | 4.54    | 10     | 17      | IPI00220740                 | 4869   | <i>NPM1</i>      |
| 2.39            | 91     | 246/270 | 7.7   | 4.32    | 4.53    | 12     | 17      | IPI00000874                 | 5052   | <i>PRDX1</i>     |
| 6.86            | 19     | 51/270  | 4.4   | 9.2     | 21.18   | 13     | 16      | IPI00465044                 | 55920  | <i>RCC2</i>      |
| 8.01            | 6      | 15/270  | 6.6   | 16.97   | 72      | 13     | 16      | IPI00001159                 | 10985  | <i>GCN1L1</i>    |
| 1.58            | 36     | 96/270  | 9     | 6.5     | 10.89   | 13     | 15      | IPI00220834                 | 7520   | <i>XRCC5</i>     |
| 4.54            | 44     | 118/270 | 4.1   | 5.86    | 8.86    | 6      | 15      | IPI00419585                 | 5478   | <i>PPIA</i>      |
| 11.05           | 3      | 8/270   | 5.1   | 21.74   | 126.28  | 9      | 14      | IPI00021248                 | 5347   | <i>PLK1</i>      |
| 5.28            | 4      | 12/270  | 8.3   | 17.1    | 81.12   | 12     | 13      | IPI00004233                 | 4288   | <i>MKI67</i>     |
| 12.01           | 1      | 2/270   | 12.5  | 41.89   | 486.75  | 13     | 13      | IPI00465022                 | 23347  | <i>SMCHD1</i>    |
| 11.7            | 1      | 3/270   | 9     | 32.86   | 311.77  | 10     | 12      | IPI00299463                 | 4683   | <i>NBN</i>       |
| 12.68           | 2      | 6/270   | 5.3   | 23.24   | 155.88  | 12     | 12      | IPI00007927                 | 10592  | <i>SMC2</i>      |
| 12.03           | 1      | 3/270   | 8     | 32.86   | 311.77  | 9      | 12      | IPI00298940                 | 6790   | <i>AURKA</i>     |
| 9.06            | 3      | 9/270   | 5.9   | 18.97   | 103.92  | 5      | 12      | IPI00019329                 | 8655   | <i>DYNLL1</i>    |
| 8.84            | 9      | 23/270  | 3.5   | 11.87   | 40.67   | 10     | 12      | IPI00328298                 | 10051  | <i>SMC4</i>      |
| 1.83            | 74     | 201/270 | 4.5   | 3.84    | 4.46    | 5      | 11      | IPI00003935                 | 8349   | <i>HIST2H2BE</i> |
| 7.08            | 3      | 8/270   | 7.5   | 19.27   | 111.94  | 10     | 11      | IPI00029159                 | 4361   | <i>MRE11A</i>    |
| -0.44           | 96     | 260/270 | 17.2  | 3.38    | 3.44    | 8      | 11      | IPI00007750                 | 7277   | <i>TUBA4A</i>    |
| 1.15            | 17     | 46/270  | 9     | 8.04    | 19.47   | 11     | 11      | IPI00003965                 | 7874   | <i>USP7</i>      |

Table S1. MS analysis of Flag-HA-53BP1 (Continued)

| Z-Score         | % TAPs | Ratio   | ASF   | S-Score | D-Score | UniPep | Tot Pep | IPI                         | GeneID | Symbol    |
|-----------------|--------|---------|-------|---------|---------|--------|---------|-----------------------------|--------|-----------|
| 9.4             | 4      | 11/270  | 4.3   | 16.43   | 81.41   | 8      | 11      | IPI00604402                 | 65263  | PYCRL     |
| -0.1            | 96     | 259/270 | 12.4  | 3.39    | 3.46    | 6      | 11      | IPI00011654                 | 203068 | TUBB      |
| 11.53           | 1      | 3/270   | 7.7   | 31.46   | 298.5   | 10     | 11      | IPI00182798                 | 22976  | PAXIP1    |
| 2.34            | 83     | 225/270 | 4.4   | 3.63    | 3.98    | 7      | 11      | IPI00025447                 | 1915   | EEF1A1    |
| -1.41           | 99     | 266/270 | 33.7  | 3.34    | 3.37    | 8      | 11      | IPI00304925                 | 3304   | HSPA1B    |
| 5.75            | 12     | 32/270  | 3.5   | 9.19    | 26.68   | 9      | 10      | IPI00017376                 | 10483  | SEC23B    |
| 0.11            | 79     | 214/270 | 11.3  | 3.55    | 3.99    | 9      | 10      | IPI00186290                 | 1938   | EEF2      |
| -0.57           | 89     | 239/270 | 28.2  | 3.36    | 3.57    | 8      | 10      | IPI00019359                 | 3857   | KRT9      |
| 14.96           | 1      | 2/270   | 6.5   | 34.86   | 405     | 8      | 9       | IPI00096972                 | 10919  | EHMT2     |
| 12.91           | 1      | 2/270   | 8     | 34.86   | 405     | 9      | 9       | IPI00028275                 | 9793   | CKAP5     |
| -1.09           | 99     | 266/270 | 42.6  | 2.85    | 2.87    | 8      | 8       | IPI00220327                 | 3848   | KRT1      |
| 4.49            | 3      | 9/270   | 7.8   | 15.49   | 84.85   | 8      | 8       | IPI00026970                 | 11198  | SUPT16H   |
| 1.28            | 31     | 85/270  | 5.8   | 5.04    | 8.98    | 6      | 8       | IPI00453473                 | 8294   | HIST1H4I  |
| 0.38            | 97     | 261/270 | 6.5   | 2.88    | 2.93    | 4      | 8       | IPI00166768                 | 84790  | TUBA1C    |
| 9.9             | 1      | 4/270   | 6.5   | 23.24   | 190.92  | 3      | 8       | IPI00294632                 | 0      | no symbol |
| 1.88            | 10     | 28/270  | 6.4   | 8.22    | 25.51   | 3,3    | 7       | IPI00216230,<br>IPI00030131 | 7112   | TMPO      |
| 5.59            | 6      | 15/270  | 4.7   | 11.22   | 47.62   | 7      | 7       | IPI00009790                 | 5214   | PFKP      |
| 1.4             | 25     | 68/270  | 6     | 5.27    | 10.51   | 5      | 7       | IPI00412259                 | 389901 | LOC389901 |
| 3.19            | 3      | 7/270   | 8.4   | 15.21   | 94.48   | 6      | 6       | IPI00339381                 | 6596   | HLTF      |
| 8.08            | 1      | 4/270   | 5     | 20.12   | 165.34  | 6      | 6       | IPI00216113                 | 11004  | KIF2C     |
| 16.37           | 0      | 1/270   | 6     | 40.25   | 40.25   | 6      | 6       | IPI00006196                 | 4926   | NUMA1     |
| 2.84            | 13     | 35/270  | 4.7   | 6.8     | 18.9    | 6      | 6       | IPI00064328                 | 10419  | PRMT5     |
| 0.08            | 64     | 172/270 | 8.6   | 3.07    | 3.85    | 6      | 6       | IPI00220644                 | 5315   | PKM2      |
| 9.79            | 1      | 2/270   | 7     | 28.46   | 330.68  | 6      | 6       | IPI00159969                 | 5978   | REST      |
| 1.23            | 61     | 166/270 | 4.1   | 3.12    | 3.98    | 6      | 6       | IPI00017375                 | 10484  | SEC23A    |
| 1.37            | 25     | 67/270  | 4.5   | 4.92    | 9.87    | 5      | 6       | IPI00465430                 | 2547   | XRCC6     |
| -1.04           | 96     | 260/270 | 12.5  | 2.5     | 2.54    | 6      | 6       | IPI00216049                 | 3190   | HNRPK     |
| 10.63           | 1      | 2/270   | 6.5   | 28.46   | 330.68  | 6      | 6       | IPI00289986                 | 472    | ATM       |
| -1.31           | 98     | 264/270 | 21.9  | 2.26    | 2.29    | 5      | 5       | IPI00301277                 | 3305   | HSPA1L    |
| 3.75            | 10     | 27/270  | 3.7   | 7.07    | 22.36   | 5      | 5       | IPI00025512                 | 3315   | HSPB1     |
| 12.77           | 1      | 2/270   | 4.5   | 25.98   | 301.87  | 5      | 5       | IPI00304895                 | 55034  | MOCOS     |
| 5.63            | 2      | 5/270   | 5.6   | 16.43   | 120.75  | 4      | 5       | IPI00020021                 | 7913   | DEK       |
| 5.9             | 4      | 11/270  | 3.1   | 11.08   | 54.89   | 5      | 5       | IPI00000846                 | 1108   | CHD4      |
| 0.62            | 95     | 256/270 | 4.1   | 2.3     | 2.36    | 2      | 5       | IPI00011134                 | 3311   | HSPA7     |
| 10.39           | 3      | 8/270   | 2.5   | 12.99   | 75.47   | 5      | 5       | IPI00010368                 | 3796   | KIF2A     |
| 12.77           | 1      | 2/270   | 4.5   | 25.98   | 301.87  | 4      | 5       | IPI00180781                 | 197259 | MLKL      |
| 12.77           | 1      | 2/270   | 4.5   | 25.98   | 301.87  | 5      | 5       | IPI00747787                 | 23310  | NCAPD3    |
| 6.5             | 9      | 23/270  | 2.2   | 7.66    | 26.25   | 4      | 5       | IPI00012578                 | 3840   | KPNA4     |
| <b>MS Run 2</b> |        |         |       |         |         |        |         |                             |        |           |
| 10.51           | 3      | 7/270   | 170.3 | 122.49  | 760.75  | 113    | 389     | IPI00029778                 | 7158   | TP53BP1   |
| 12.42           | 1      | 4/270   | 58.8  | 91.49   | 751.65  | 1,51   | 124     | IPI00103951,<br>IPI00045496 | 57646  | USP28     |
| 9.41            | 36     | 97/270  | 13.8  | 18.43   | 30.74   | 96     | 122     | IPI00296337                 | 5591   | PRKDC     |
| 11              | 2      | 6/270   | 26    | 54.91   | 368.34  | 40     | 67      | IPI00470805                 | 9656   | MDC1      |
| 12.57           | 1      | 4/270   | 27.8  | 63.11   | 518.48  | 47     | 59      | IPI00293845                 | 55183  | RIF1      |

Table S1. MS analysis of Flag-HA-53BP1 (Continued)

| Z-Score | % TAPs | Ratio   | ASF  | S-Score | D-Score | UniPep | Tot Pep | IPI                         | GeneID | Symbol    |
|---------|--------|---------|------|---------|---------|--------|---------|-----------------------------|--------|-----------|
| 11.55   | 1      | 2/270   | 55   | 86.17   | 1001.19 | 30     | 55      | IPI00032958                 | 54443  | ANLN      |
| 10.44   | 6      | 17/270  | 8.3  | 28.18   | 112.31  | 22     | 50      | IPI00031650                 | 84309  | NUDT16L1  |
| 10.17   | 2      | 6/270   | 20.3 | 45      | 301.87  | 34     | 45      | IPI00305289                 | 3832   | KIF11     |
| 11.4    | 1      | 3/270   | 31   | 62.93   | 596.99  | 36     | 44      | IPI00293921                 | 11073  | TOPBP1    |
| 0.85    | 99     | 266/270 | 29.8 | 6.61    | 6.66    | 27     | 43      | IPI00003362                 | 3309   | HSPA5     |
| 9.63    | 6      | 16/270  | 10.8 | 25.65   | 105.38  | 3,27   | 39      | IPI00305282,<br>IPI00107531 | 10111  | RAD50     |
| 11.72   | 1      | 2/270   | 35.5 | 69.71   | 810     | 29     | 36      | IPI00008477                 | 22974  | TPX2      |
| -0.88   | 99     | 266/270 | 55.1 | 5.7     | 5.74    | 23     | 32      | IPI00003865                 | 3312   | HSPA8     |
| 12.33   | 1      | 2/270   | 29   | 64.69   | 751.65  | 21     | 31      | IPI00306400                 | 3833   | KIFC1     |
| 7.6     | 39     | 104/270 | 4.5  | 8.53    | 13.74   | 17     | 28      | IPI00011200                 | 26227  | PHGDH     |
| 13.2    | 2      | 6/270   | 9.3  | 34.86   | 233.83  | 2,15   | 27      | IPI00396171,<br>IPI00220113 | 4134   | MAP4      |
| 5.89    | 4      | 12/270  | 13.6 | 23.72   | 112.5   | 21     | 25      | IPI00021405                 | 4000   | LMNA      |
| 3.06    | 60     | 163/270 | 5.9  | 6.17    | 7.94    | 15     | 23      | IPI00002214                 | 3838   | KPNA2     |
| -0.34   | 96     | 260/270 | 27.2 | 4.67    | 4.76    | 15     | 21      | IPI00007752                 | 10383  | TUBB2C    |
| 8.36    | 18     | 48/270  | 3.8  | 10.34   | 24.52   | 15     | 19      | IPI00024661                 | 9632   | SEC24C    |
| 0.63    | 7      | 18/270  | 36.4 | 16.43   | 63.64   | 1,12   | 18      | IPI00641743,<br>IPI00019848 | 3054   | HCFC1     |
| -0.96   | 99     | 266/270 | 33.7 | 4.27    | 4.31    | 13     | 18      | IPI00304925                 | 3304   | HSPA1B    |
| 1.23    | 91     | 245/270 | 10   | 4.33    | 4.54    | 9      | 17      | IPI00220740                 | 4869   | NPM1      |
| 11.21   | 1      | 3/270   | 12   | 39.12   | 371.08  | 14     | 17      | IPI00295502                 | 58525  | WIZ       |
| 8.52    | 6      | 15/270  | 6.6  | 17.49   | 74.22   | 13     | 17      | IPI00001159                 | 10985  | GCN1L1    |
| 0.6     | 93     | 250/270 | 10.3 | 4.16    | 4.32    | 7      | 16      | IPI00014424                 | 1917   | EEF1A2    |
| 2.15    | 91     | 246/270 | 7.7  | 4.19    | 4.39    | 11     | 16      | IPI00000874                 | 5052   | PRDX1     |
| 1.58    | 36     | 96/270  | 9    | 6.5     | 10.89   | 10     | 15      | IPI00220834                 | 7520   | XRCC5     |
| 11.05   | 3      | 8/270   | 5.1  | 21.74   | 126.28  | 9      | 14      | IPI00021248                 | 5347   | PLK1      |
| -0.9    | 99     | 266/270 | 42.6 | 3.77    | 3.8     | 13     | 14      | IPI00220327                 | 3848   | KRT1      |
| -0.42   | 89     | 239/270 | 28.2 | 3.98    | 4.23    | 13     | 14      | IPI00019359                 | 3857   | KRT9      |
| -0.28   | 96     | 260/270 | 17.2 | 3.67    | 3.74    | 8      | 13      | IPI00007750                 | 7277   | TUBA4A    |
| 11.14   | 4      | 11/270  | 4.3  | 17.86   | 88.5    | 9      | 13      | IPI00604402                 | 65263  | PYCRL     |
| 9.6     | 9      | 23/270  | 3.5  | 12.35   | 42.33   | 2,10   | 13      | IPI00411559,<br>IPI00328298 | 10051  | SMC4      |
| 7.74    | 3      | 8/270   | 7.5  | 20.12   | 116.91  | 12     | 12      | IPI00029159                 | 4361   | MRE11A    |
| 2.11    | 31     | 85/270  | 5.8  | 6.17    | 11      | 7      | 12      | IPI00453473                 | 8294   | HIST1H4I  |
| 2.66    | 83     | 225/270 | 4.4  | 3.79    | 4.16    | 7      | 12      | IPI00025447                 | 1915   | EEF1A1    |
| 11.08   | 1      | 2/270   | 12.5 | 40.25   | 467.65  | 12     | 12      | IPI00465022                 | 23347  | SMCHD1    |
| 1.83    | 74     | 201/270 | 4.5  | 3.84    | 4.46    | 6      | 11      | IPI00003935                 | 8349   | HIST2H2BE |
| 10.72   | 1      | 3/270   | 9    | 31.46   | 298.5   | 11     | 11      | IPI00299463                 | 4683   | NBN       |
| 11.02   | 1      | 3/270   | 8    | 31.46   | 298.5   | 8      | 11      | IPI00298940                 | 6790   | AURKA     |
| 11.53   | 1      | 3/270   | 7.7  | 31.46   | 298.5   | 10     | 11      | IPI00182798                 | 22976  | PAXIP1    |
| 3.16    | 44     | 118/270 | 4.1  | 5.02    | 7.59    | 6      | 11      | IPI00419585                 | 5478   | PPIA      |
| 4.6     | 19     | 51/270  | 4.4  | 7.63    | 17.56   | 9      | 11      | IPI00465044                 | 55920  | RCC2      |
| 13.54   | 1      | 4/270   | 5    | 25.98   | 213.45  | 9      | 10      | IPI00216113                 | 11004  | KIF2C     |
| 0.5     | 17     | 45/270  | 21.5 | 7.75    | 7.75    | 10     | 10      | IPI00302592                 | 2316   | FLNA      |
| -0.22   | 96     | 259/270 | 12.4 | 3.23    | 3.3     | 6      | 10      | IPI00011654                 | 203068 | TUBB      |

Table S1. MS analysis of Flag-HA-53BP1 (Continued)

| Z-Score | % TAPs | Ratio   | ASF  | S-Score | D-Score | UniPep | Tot Pep | IPI                         | GeneID | Symbol           |
|---------|--------|---------|------|---------|---------|--------|---------|-----------------------------|--------|------------------|
| 3.61    | 4      | 12/270  | 8.3  | 14.23   | 67.5    | 1,8    | 9       | IPI00301293,<br>IPI00004233 | 4288   | <i>MKI67</i>     |
| 7.25    | 6      | 15/270  | 4.7  | 12.73   | 54      | 8      | 9       | IPI00009790                 | 5214   | <i>PFKP</i>      |
| -0.52   | 96     | 260/270 | 12.5 | 3.06    | 3.12    | 8      | 9       | IPI00216049                 | 3190   | <i>HNRPK</i>     |
| -1.07   | 98     | 264/270 | 21.9 | 2.86    | 2.89    | 6      | 8       | IPI00301277                 | 3305   | <i>HSPA1L</i>    |
| 0.36    | 64     | 172/270 | 8.6  | 3.54    | 4.44    | 1,5    | 8       | IPI00479186,<br>IPI00220644 | 5315   | <i>PKM2</i>      |
| 3.1     | 25     | 68/270  | 4.3  | 5.64    | 11.23   | 7      | 8       | IPI00021290                 | 47     | <i>ACLY</i>      |
| 5.99    | 3      | 9/270   | 5.9  | 15.49   | 84.85   | 4      | 8       | IPI00019329                 | 8655   | <i>DYNLL1</i>    |
| 1.65    | 25     | 68/270  | 6    | 5.64    | 11.23   | 7      | 8       | IPI00412259                 | 389901 | <i>LOC389901</i> |
| 13.08   | 1      | 2/270   | 7    | 32.86   | 381.84  | 8      | 8       | IPI00159969                 | 5978   | <i>REST</i>      |
| 4.47    | 6      | 16/270  | 4.6  | 10.87   | 44.65   | 7      | 7       | IPI00054042                 | 2969   | <i>GTF2I</i>     |
| 7.34    | 2      | 6/270   | 5.3  | 17.75   | 119.06  | 7      | 7       | IPI00007927                 | 10592  | <i>SMC2</i>      |
| -0.21   | 79     | 214/270 | 11.3 | 2.97    | 3.34    | 7      | 7       | IPI00186290                 | 1938   | <i>EEF2</i>      |
| 3.37    | 13     | 35/270  | 4.7  | 7.35    | 20.41   | 6      | 7       | IPI00064328                 | 10419  | <i>PRMT5</i>     |
| 0.67    | 17     | 46/270  | 9    | 6.41    | 15.53   | 7      | 7       | IPI00003965                 | 7874   | <i>USP7</i>      |
| 3.91    | 3      | 9/270   | 7.8  | 14.49   | 79.37   | 7      | 7       | IPI00026970                 | 11198  | <i>SUPT16H</i>   |
| 10.02   | 1      | 2/270   | 8    | 30.74   | 357.18  | 7      | 7       | IPI00028275                 | 9793   | <i>CKAP5</i>     |
| -1.08   | 95     | 257/270 | 22.1 | 2.71    | 2.78    | 7      | 7       | IPI00007765                 | 3313   | <i>HSPA9</i>     |
| 12.41   | 1      | 2/270   | 6.5  | 30.74   | 357.18  | 7      | 7       | IPI00289986                 | 472    | <i>ATM</i>       |
| 8.65    | 1      | 4/270   | 6.5  | 21.74   | 178.59  | 4      | 7       | IPI00294632                 | 0      | [no symbol]      |
| 4.56    | 10     | 27/270  | 3.7  | 7.75    | 24.49   | 6      | 6       | IPI00025512                 | 3315   | <i>HSPB1</i>     |
| 16.37   | 0      | 1/270   | 6    | 40.25   | 40.25   | 4,2    | 6       | IPI00383594,<br>IPI00011840 | 84939  | <i>MUM1</i>      |
| 3.35    | 12     | 32/270  | 3.5  | 7.12    | 20.67   | 6      | 6       | IPI00017376                 | 10483  | <i>SEC23B</i>    |
| 16.37   | 0      | 1/270   | 6    | 40.25   | 40.25   | 5      | 6       | IPI00412298                 | 545    | <i>ATR</i>       |
| 1.17    | 95     | 256/270 | 4.1  | 2.52    | 2.58    | 3      | 6       | IPI00011134                 | 3311   | <i>HSPA7</i>     |
| 0.29    | 84     | 226/270 | 6    | 2.68    | 2.68    | 5      | 6       | IPI00217465                 | 3006   | <i>HIST1H1C</i>  |
| 13.48   | 1      | 3/270   | 3.7  | 23.24   | 220.45  | 6      | 6       | IPI00160901                 | 51512  | <i>GTSE1</i>     |
| -0.05   | 97     | 261/270 | 6.5  | 2.49    | 2.53    | 4      | 6       | IPI00166768                 | 84790  | <i>TUBA1C</i>    |
| 1.37    | 2      | 6/270   | 19.8 | 16.43   | 110.23  | 6      | 6       | IPI00329605                 | 4437   | <i>MSH3</i>      |
| 16.37   | 0      | 1/270   | 5    | 36.74   | 36.74   | 5      | 5       | IPI00293963                 | 9425   | <i>CDYL</i>      |
| 6.21    | 9      | 24/270  | 2.3  | 7.5     | 25.16   | 4      | 5       | IPI00013774                 | 3065   | <i>HDAC1</i>     |
| 16.37   | 0      | 1/270   | 5    | 36.74   | 36.74   | 5      | 5       | IPI00465045                 | 57609  | <i>DIP2B</i>     |
| 0.87    | 61     | 166/270 | 4.1  | 2.85    | 3.64    | 5      | 5       | IPI00017375                 | 10484  | <i>SEC23A</i>    |
| 0.47    | 43     | 115/270 | 5.7  | 3.43    | 5.25    | 5      | 5       | IPI00021187                 | 8607   | <i>RUVBL1</i>    |
| 8.31    | 7      | 18/270  | 1.9  | 8.66    | 33.54   | 4      | 5       | IPI00106698                 | 3672   | <i>ITGA1</i>     |
| 14.04   | 1      | 4/270   | 2.5  | 18.37   | 150.93  | 4      | 5       | IPI00299214                 | 7083   | <i>TK1</i>       |
| -0.46   | 84     | 227/270 | 9.4  | 2.44    | 2.66    | 3      | 5       | IPI00006510                 | 81027  | <i>TUBB1</i>     |
| 1.49    | 61     | 166/270 | 2.8  | 2.85    | 3.64    | 2      | 5       | IPI00026272                 | 3012   | <i>HIST1H2AE</i> |
| 6.5     | 9      | 23/270  | 2.2  | 7.66    | 26.25   | 5      | 5       | IPI00012578                 | 3840   | <i>KPNA4</i>     |
| 8.95    | 2      | 6/270   | 3.5  | 15      | 100.62  | 3      | 5       | IPI00062037                 | 140735 | <i>DYNLL2</i>    |
| 0.06    | 39     | 106/270 | 10.5 | 3.57    | 3.57    | 5      | 5       | IPI00293464                 | 1642   | <i>DDB1</i>      |

Identified proteins with four or more unique peptides are shown. The sample was analyzed in duplicate, and the results of each run are indicated (MS Run 1 and MS Run 2).



Table S2. **Antibodies used in this study**

| <b>Antibody</b>            | <b>Method</b>                | <b>Source</b>  | <b>Identifier</b> |
|----------------------------|------------------------------|----------------|-------------------|
| Flag (mouse)               | WB and IP                    | Sigma          | F3165             |
| HA (mouse)                 | WB, IF, and IP               | BioLegend      | 901501            |
| $\beta$ -Actin HRP (mouse) | WB                           | Sigma          | A3854             |
| Alexa Fluor 488 (mouse)    | IF                           | Invitrogen     | A11029            |
| Alexa Fluor 488 (rabbit)   | IF                           | Invitrogen     | A11034            |
| Alexa Fluor 488 (rat)      | Flow cytometry and DNA fiber | Invitrogen     | A11006            |
| Alexa Fluor 594 (mouse)    | IF                           | Invitrogen     | A11032            |
| Alexa Fluor 594 (rabbit)   | IF                           | Invitrogen     | A11037            |
| Pacific Blue (mouse)       | IF (FUCCI)                   | Invitrogen     | P31582            |
| Aurora A (mouse)           | WB and IF                    | Abcam          | ab13824           |
| TPX2 (rabbit)              | WB                           | Bethyl         | A300-430A         |
| TPX2 (rabbit)              | IF and IP                    | Bethyl         | A300-429A         |
| 53BP1 (mouse)              | WB and IF                    | BD Biosciences | 612522            |
| GAPDH                      | WB                           | Abcam          | ab181602          |
| Histone H3 (rabbit)        | WB                           | Abcam          | ab1791            |
| GST (rabbit)               | WB                           | Santa Cruz     | SC-459            |
| Histone H3 pS10 (rabbit)   | WB                           | Cell Signaling | 9701S             |
| LSD1 (mouse)               | WB                           | Santa Cruz     | SC-53875          |
| BRCA1 (mouse)              | IF                           | Santa Cruz     | SC-6954           |
| BRCA1 (mouse)              | WB                           | Abcam          | Ab16781           |
| pH2AX (mouse)              | IF                           | Abcam          | Ab26350           |
| pH2AX (rabbit)             | IF                           | Active Motif   | 39117             |
| Rad51 (rabbit)             | IF                           | Santa Cruz     | SC-8349           |
| Rif1 (rabbit)              | IF                           | Bethyl         | A300-569A         |
| RPA32 (rat)                | Flow cytometry               | Cell Signaling | 2208S             |
| HRP (mouse)                | WB                           | Cell Signaling | 7076S             |
| HRP (rabbit)               | WB                           | Cell Signaling | 7074S             |
| BrdU (rat)                 | DNA fiber                    | Abcam          | ab6326            |
| BrdU (mouse)               | DNA fiber                    | BD Biosciences | 347580            |

IF, immunofluorescence; IP, immunoprecipitation; WB, Western blot.
